# Supplementary material for: CDC42 controls the activation of primordial follicles by regulating PI3K signaling in mouse oocytes
Source: PubMed Central journal article supplement (PMC6033292; doi:10.1186/s12915-018-0541-4), 2018-07-05

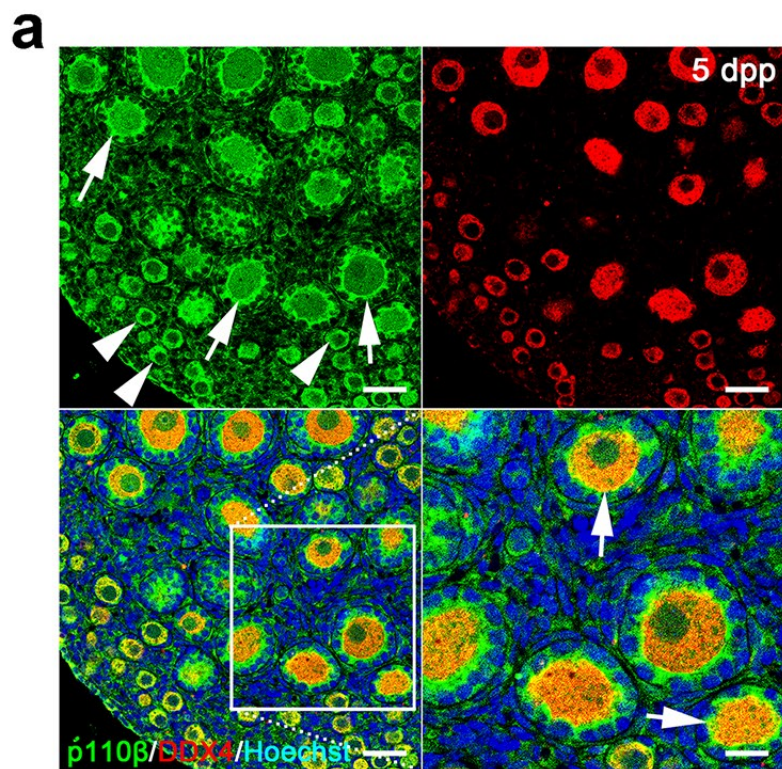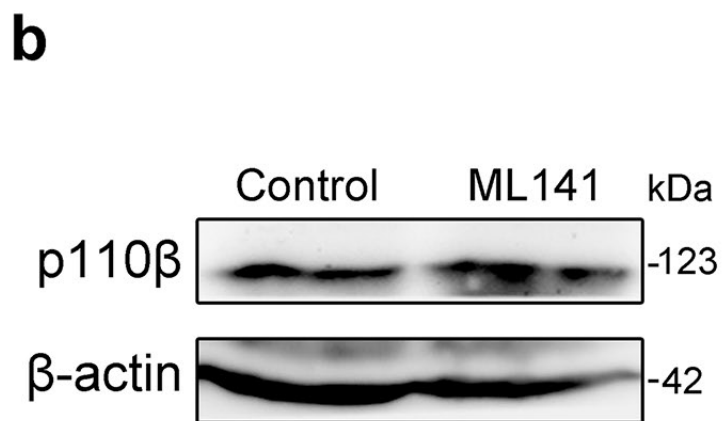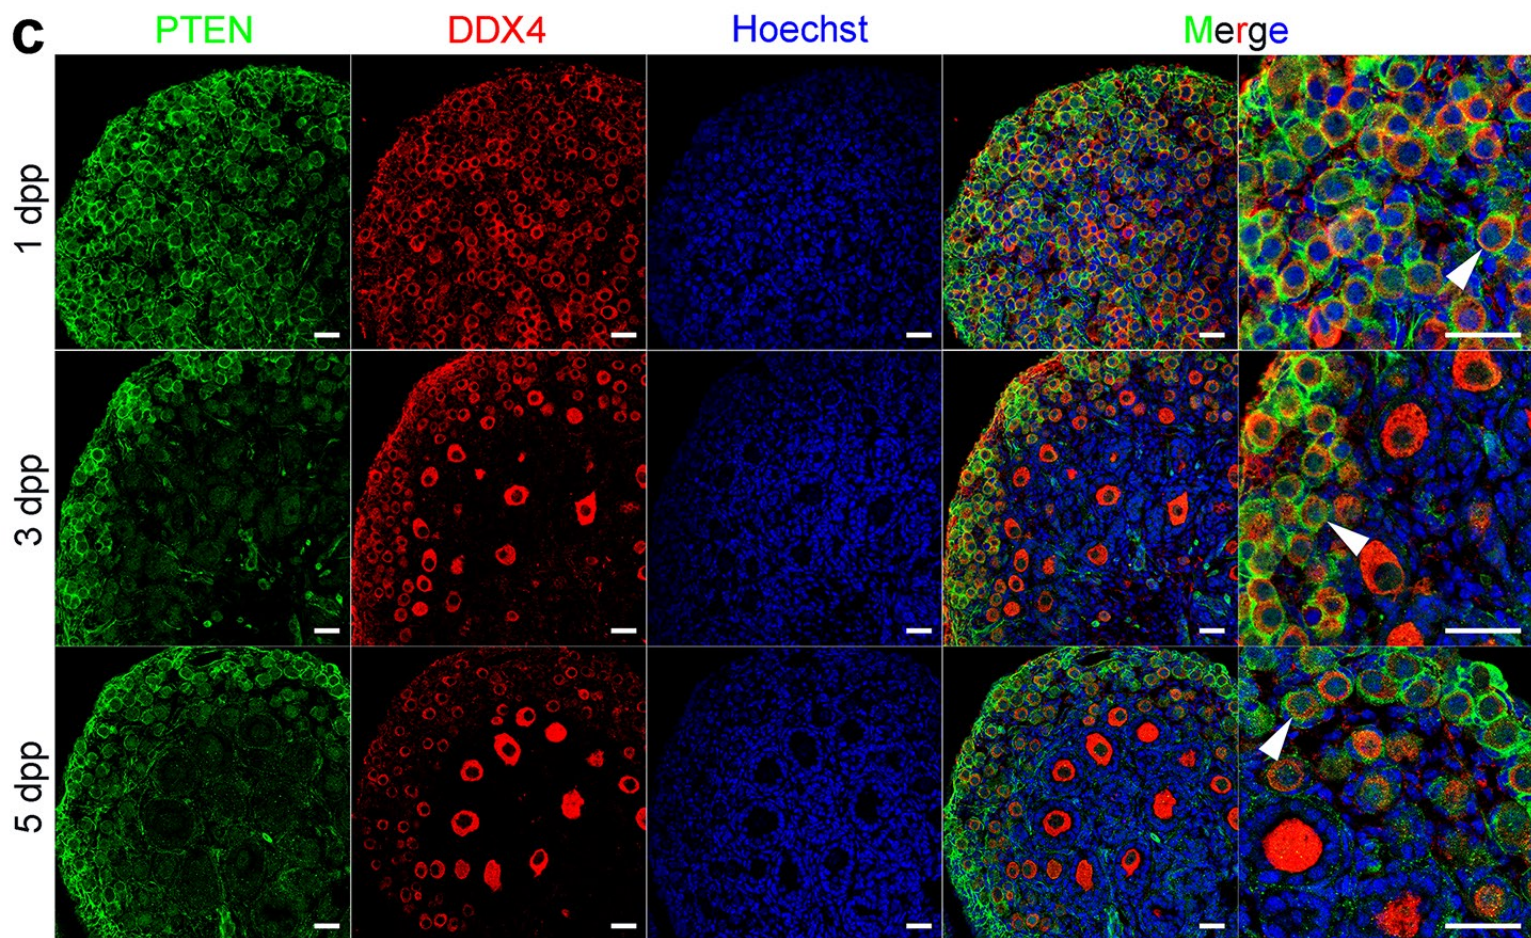

Supplement: 12915_2018_541_MOESM4_ESM.pdf [file 12915_2018_541_MOESM4_ESM.pdf]
